# Supplementary material for: Enhancing Workflow Recall in Electronic Health Records Using Mouse Indicators: A Randomized Parallel Pilot Study
Source: Research Square preprint supplement (doi:10.21203/rs.3.rs-8073041/v1), 2025-11-11
Supplement: Supplementary file 1 [file f2d52f8dd2337b037a039fc7.docx]

**Appendix A: IRB Approval**

**
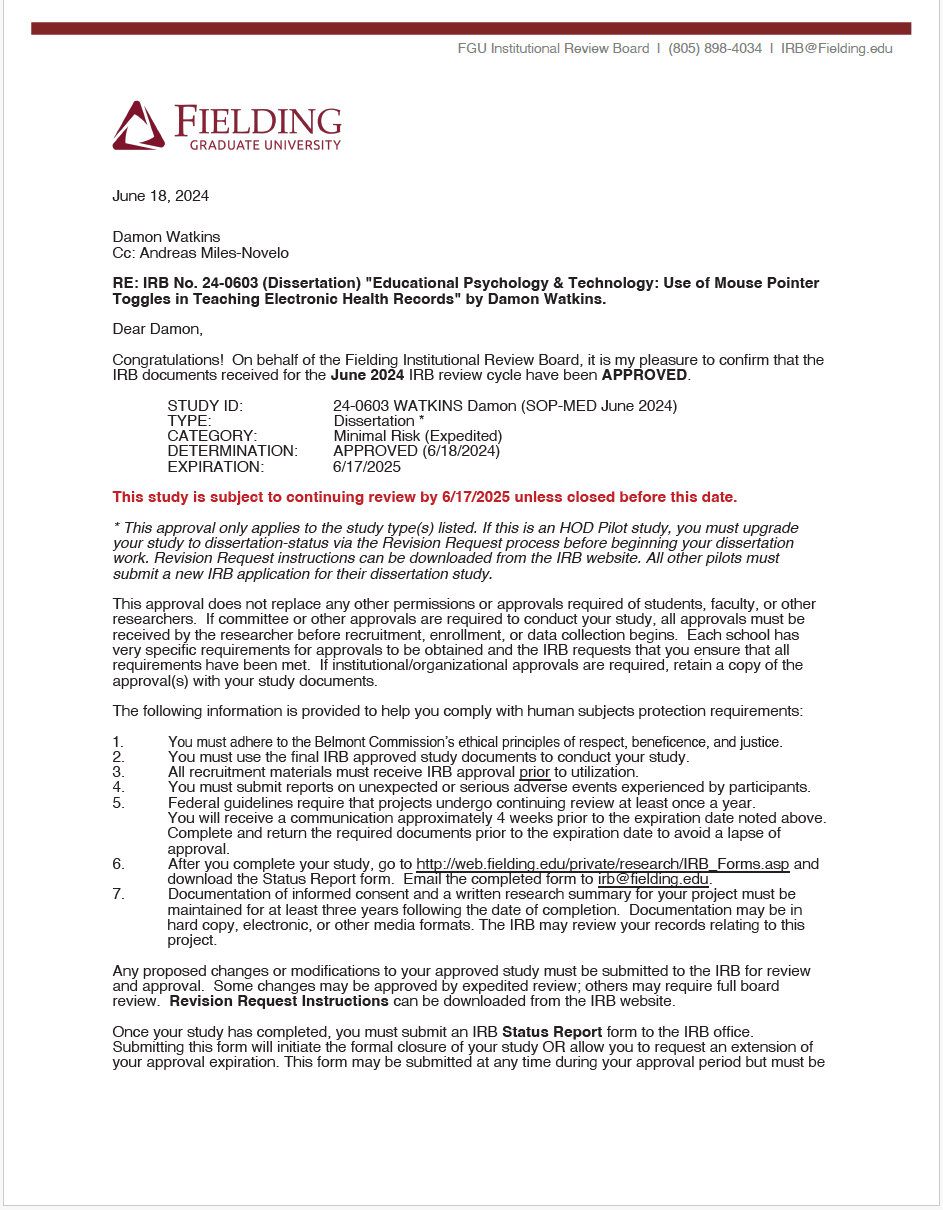
**

**
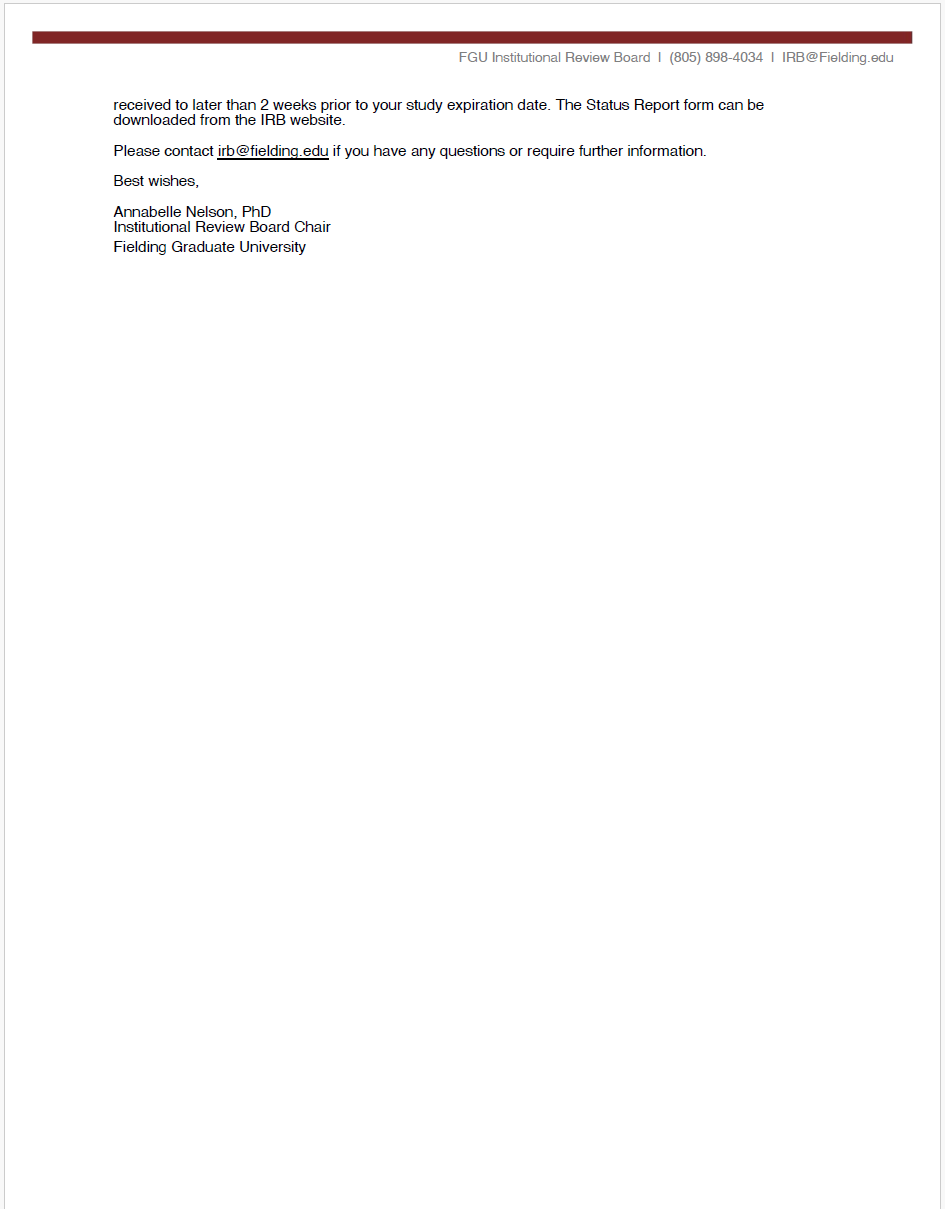
**

**Appendix B: G*Power 3 Power Analysis Settings**

**Figure B1**

*G*Power 3 Power Analysis Settings*


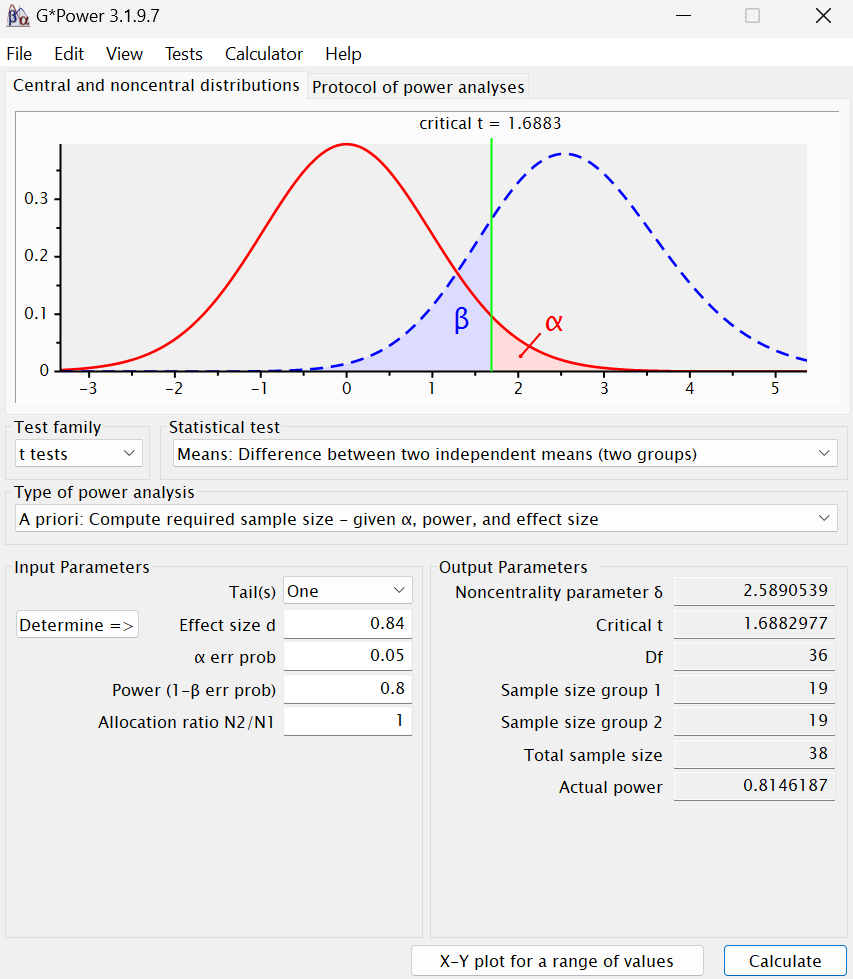


**Appendix C: Prolific Matches and Screeners**

**Figure C1**

*Prolific Matches and Screeners*

**
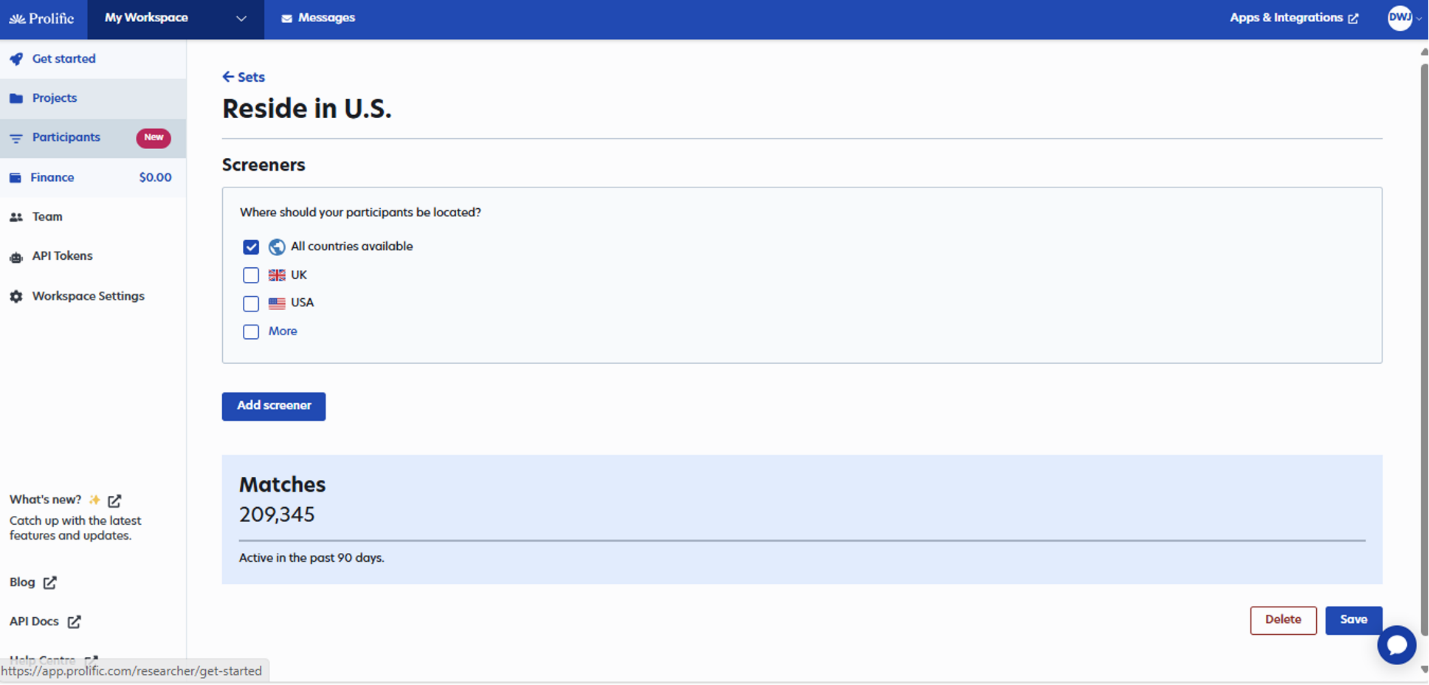
**

*Note: Prolific matches before screeners.*

**Figure C2**

*Prolific Matches and Screeners Continued*

*
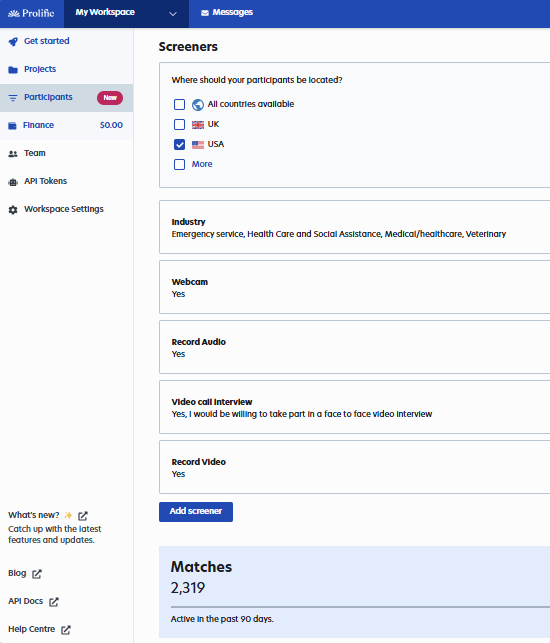
*

*Note: Inclusion/ exclusion criteria (screeners) reduced the potential participant matches from 209,345 participants to 2,319 participants.*

**Appendix D: Prolific Study Description**


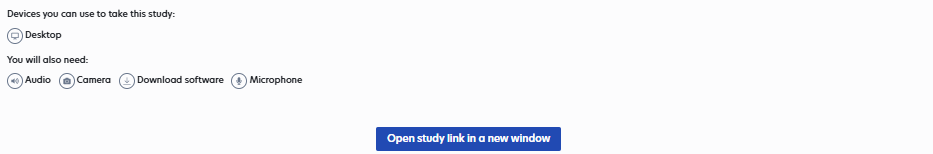

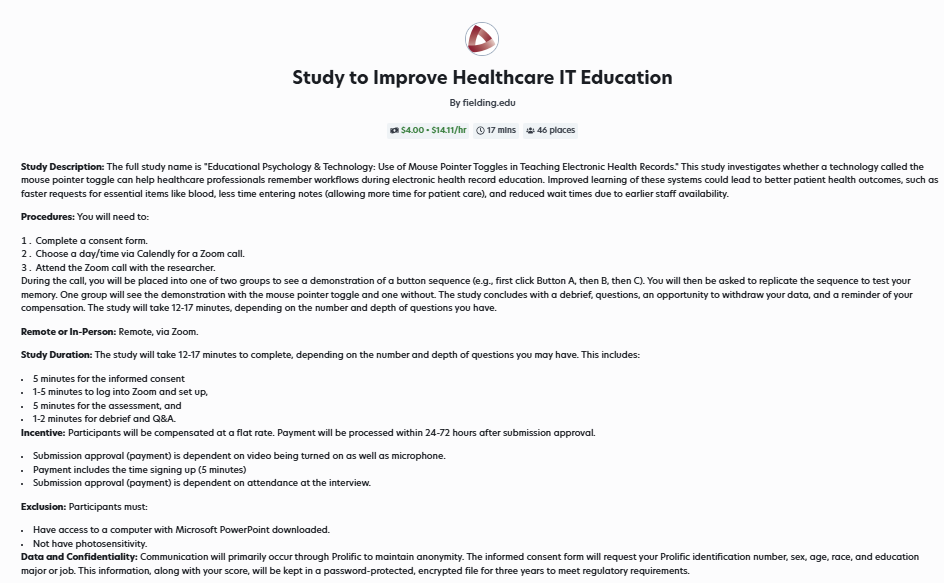


*Note: The time and payment were reduced to 15 minutes and $3.75 for the actual study.*

**Appendix E: Informed Consent**


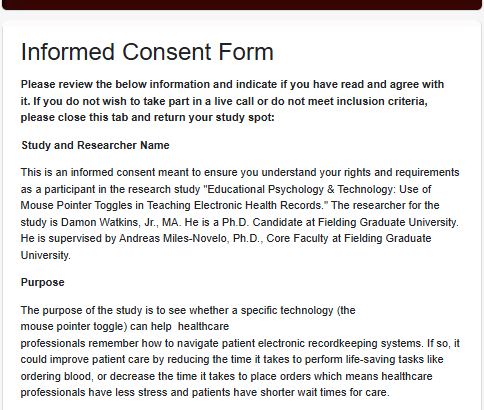


**
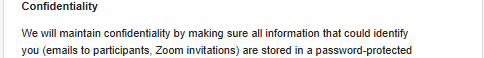

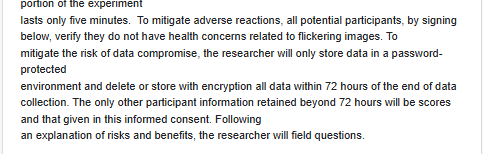
**
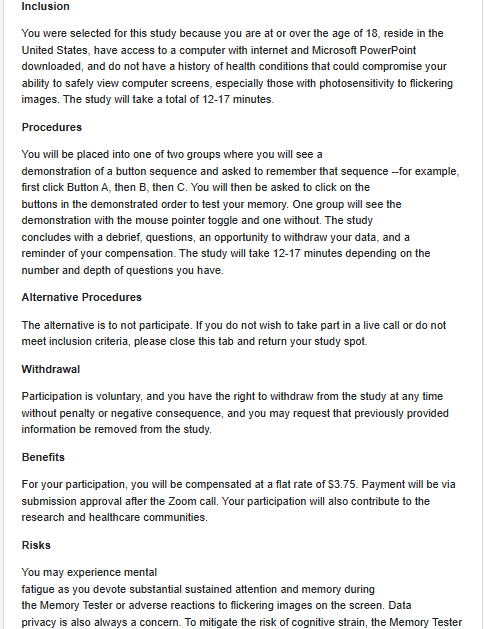


**
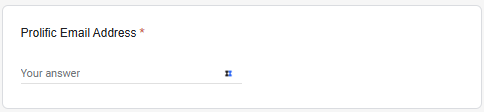

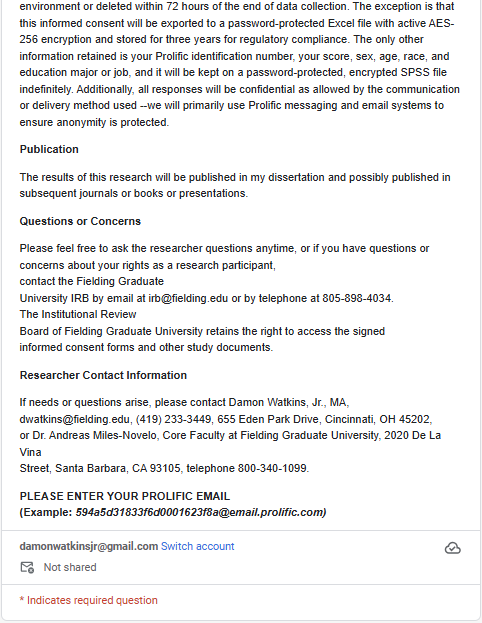
**


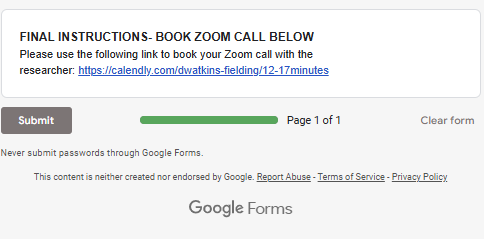

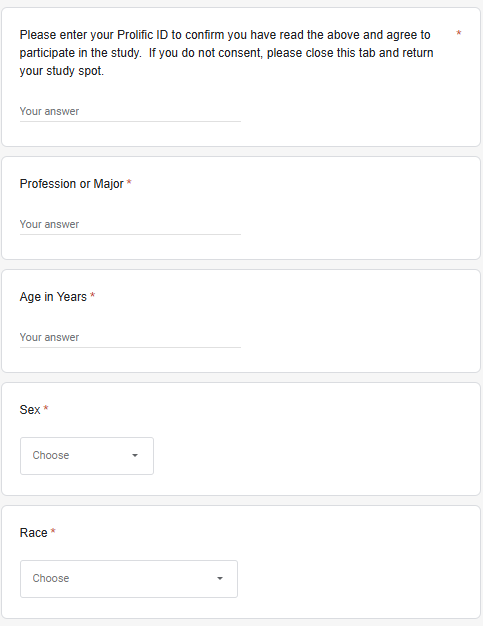


*
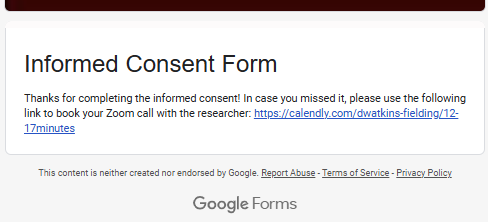
*

*Note: the informed consent outlines all relevant information concerning the study.* *The benefit, a flat rate payment of $3.75 for 15 minutes, was deemed “great” by Prolific. The consent mentions risks and mitigations, but the repetition of certain mitigations is not mentioned: to mitigate the risk of adverse reaction to flickering images (the MPT) participants were not only warned about photosensitivity in the informed consent but also the Prolific page and the Memory Tester.* *To reduce the risk of a data breach, all data was not only encrypted or deleted, but all participants were also asked to anonymize their data by using their Prolific IDs and emails in lieu of their proper name and email on the informed consent, Calendly, and Zoom.*

**Appendix F: Researcher Study Checklist**

**Before Zoom Call**

1. Receive Calendly notification
2. Verify participant sent informed consent
3. Send participant Zoom invite via Prolific email
   1. DO NOT approve their payment until the Zoom meeting concludes

***Send Zoom Meeting Confirmation***

Hello!

This email reconfirms your Zoom meeting information. Payment will be approved after attending the Zoom call. Zoom information (Please change your Zoom name to your Prolific ID for anonymity and have the ID available for the call):

**Wednesday, July 17, 2024 TOMORROW**

07:00pm - 07:17pm Eastern Time

**57qb618b8e26d6869196c3bb**

EMAIL

57qb618b8e26d6869196c3bb@email.prolific.com

LOCATION

This is a Zoom web conference.
Additional details to join this meeting

**Attendees can join this meeting from a computer.**

<https://fielding-edu.zoom.us/j/88936105462>

This is a one-on-one slot with you and me; please let me know if you need to reschedule; otherwise, thank you for your participation, and I look forward to our call!

**Start**

Hello, my name is Damon. How was your day?

1. Instruct the participant to share their screen.
2. Post a link to the Memory Tester PowerPoint in the Zoom chat: [Mouse Toggle Memory Tester II- With Cursor.pptx](https://1drv.ms/p/c/a4255c68a7d94792/EZJH2adoXCUggKTlLgAAAAABwEHQIVvaguo2u21ytV1_OA)
3. Participant click on the link
4. Participant verify their computer or **speaker volume** is on high as to ensure they can hear the prompts and demonstration in the PowerPoint.
5. Inform the participant of their test group name and number (i.e. Group One: Verbal or Group Two: Verbal and Toggle)
6. Instruct the subject to begin the Memory Tester by clicking the slide show view in the bottom right of the PowerPoint. Have the subject press the right arrow on their keyboard, at which point the PowerPoint will proceed to the second slide. From there, the PowerPoint is programmed to give the participant prompts and transition automatically.

**Finish**

1. Thank you for your time and participation
2. Restate the study purpose and hypotheses:
   1. The purpose of the study is to see whether a specific technology (the mouse pointer toggle) can help  healthcare professionals remember how to navigate patient electronic recordkeeping systems. If so, it could improve patient care by reducing the time it takes to perform life-saving tasks like ordering blood, or decrease the time it takes to place orders which means healthcare professionals have less stress and patients have shorter wait times for care. The hypothesis is the mouse pointer toggle will improve learning outcomes.
3. Your payment will be approved within 24-72 hours
4. You do have the option to withdraw data. Would you like to withdraw your data?
5. What questions do you have?
6. Last thing, if you could please verify your Prolific ID by placing it in the chat

**After Zoom call**

1. Enter score
2. Confirm participant payment

**Send if Zoom Meeting is Missed**

Hi,

I noticed we missed our video call on Thursday, July 4, 2024, from 8:00 AM to 8:17 AM.

If you’d like to reschedule, please use this Calendly link: <https://calendly.com/dwatkins-fielding/12-17minutes>

If you’re unable to reschedule, no worries! Have a great weekend!

Warm regards,

Damon

**Appendix G: Mouse Pointer Toggle Memory Tester**

Access the Memory Tester by clicking or copying and pasting to a web browser the below link:

<https://1drv.ms/p/c/a4255c68a7d94792/EZJH2adoXCUggKTlLgAAAAABwEHQIVvaguo2u21ytV1_OA>

**Figure G1**

*
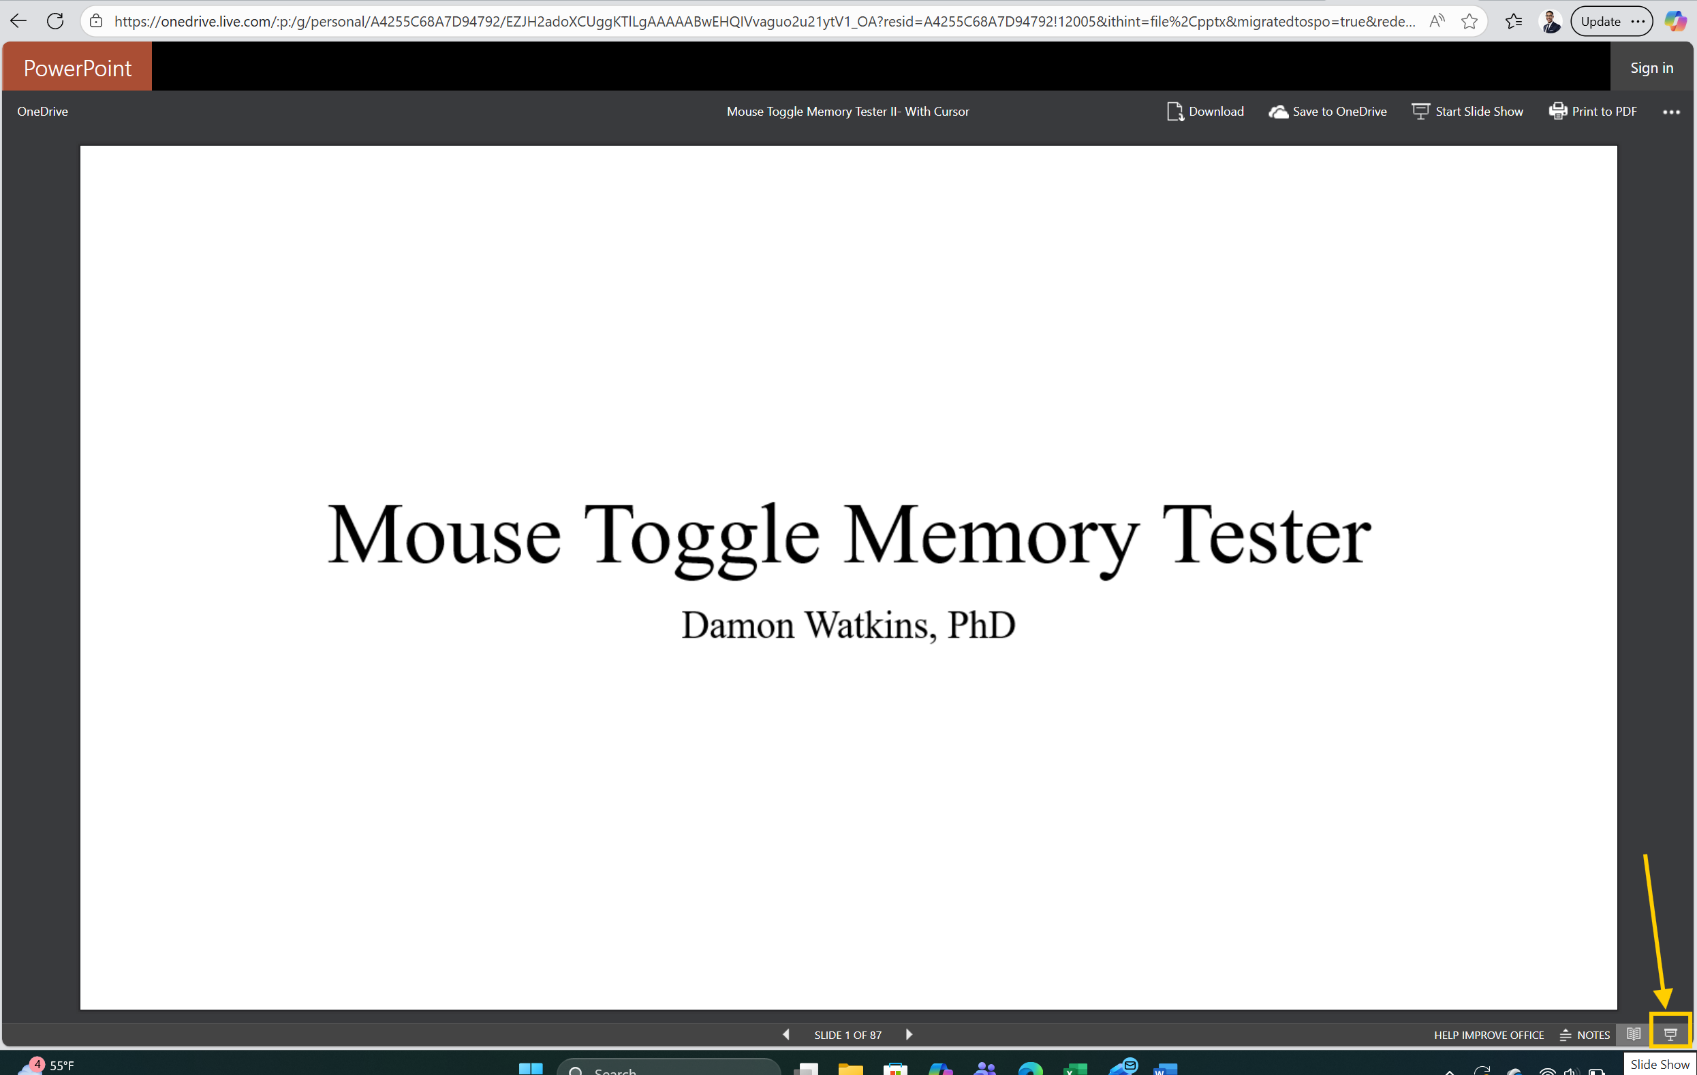
Beginning the Memory Tester*

*Note: Select the Slide Show tab and press the right arrow on the keyboard to begin.*

**Appendix H: SPSS Variables**

**Figure H1**

*SPSS Variables*


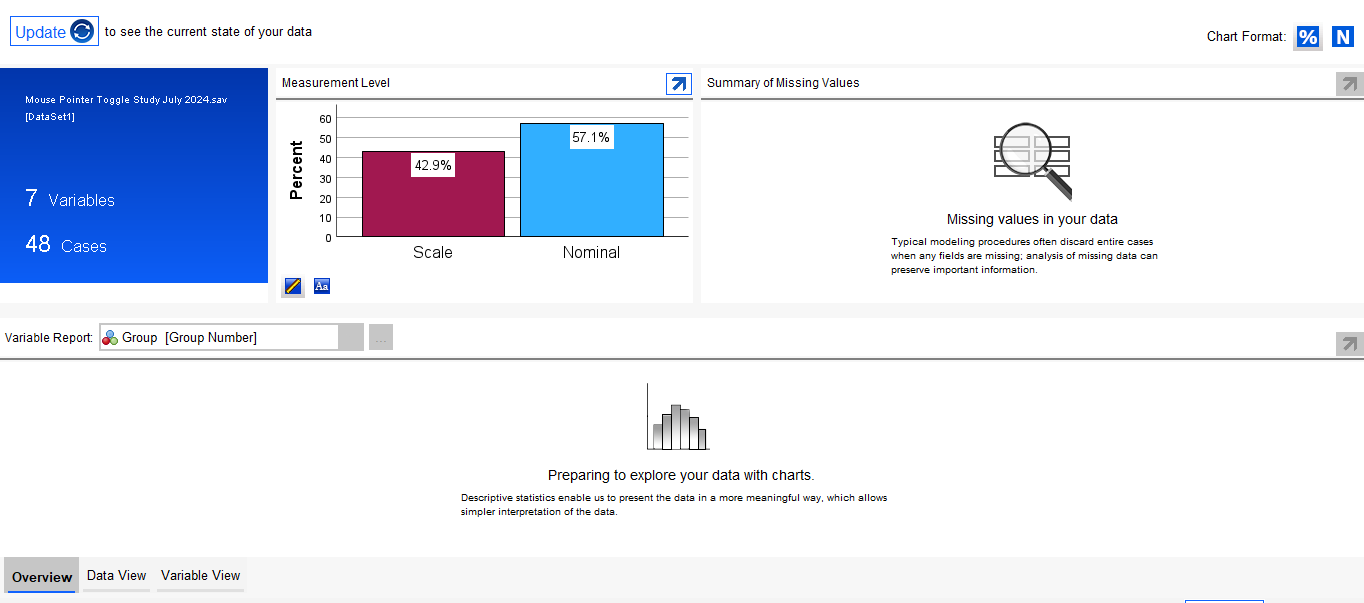


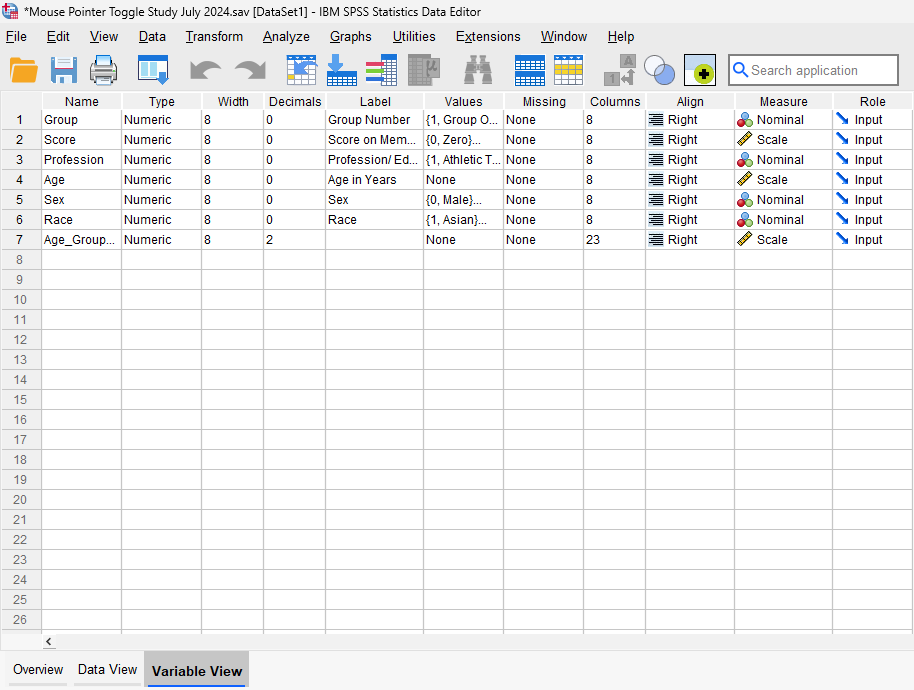


*Note: Line seven was unused—the sample size was insufficient to do the desired exploratory test.*


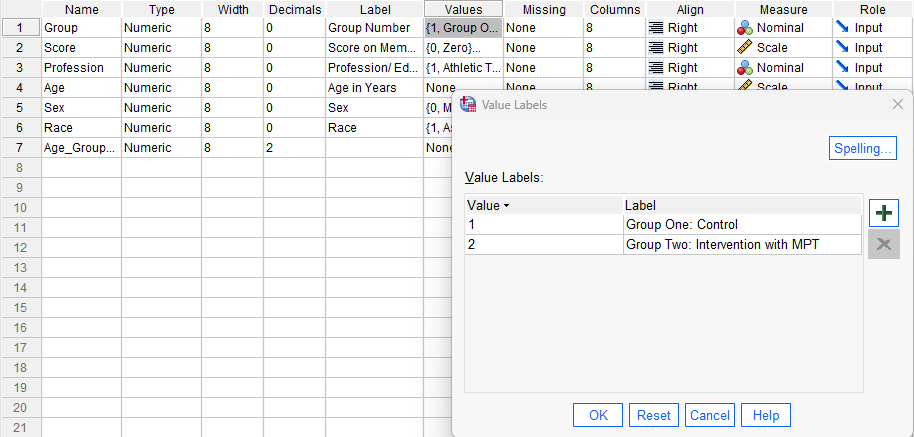


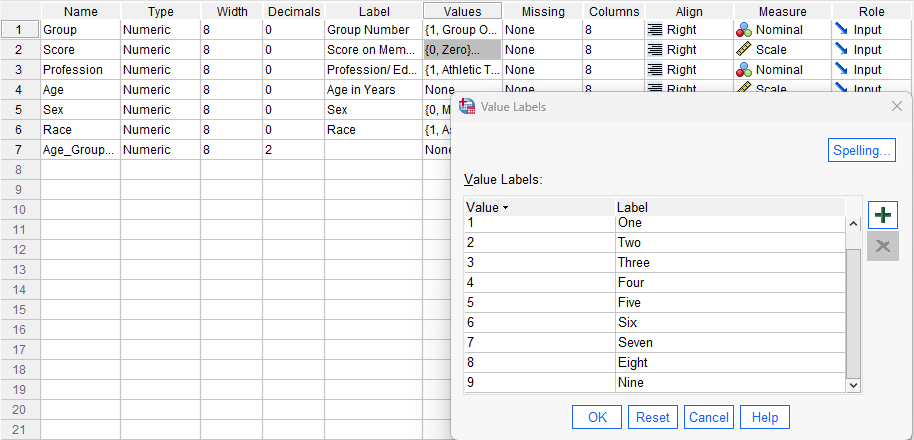


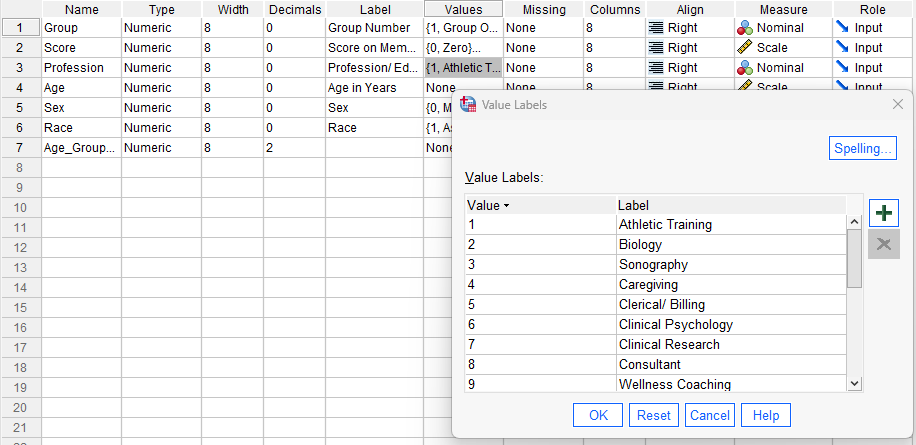


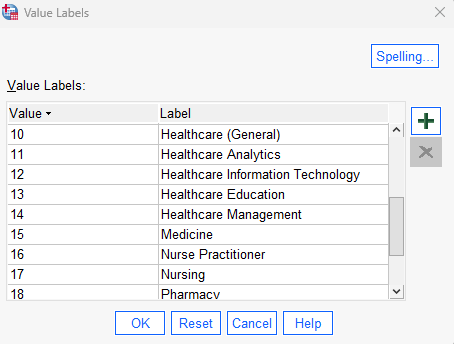


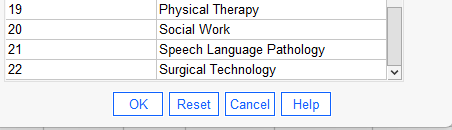


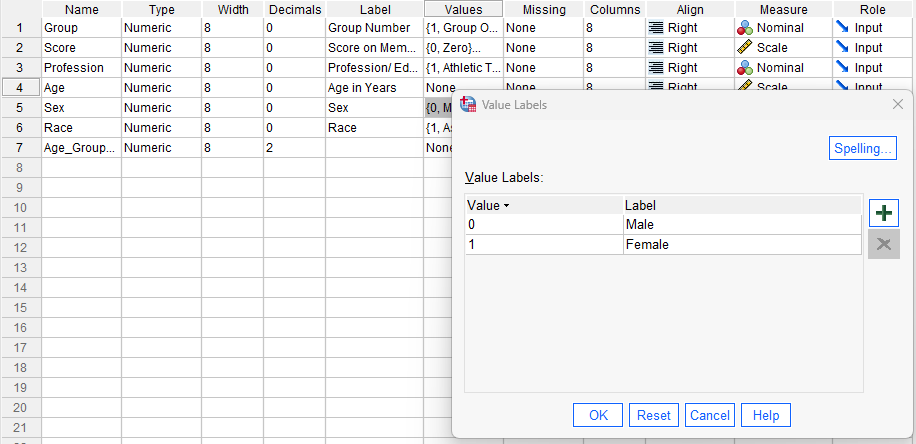


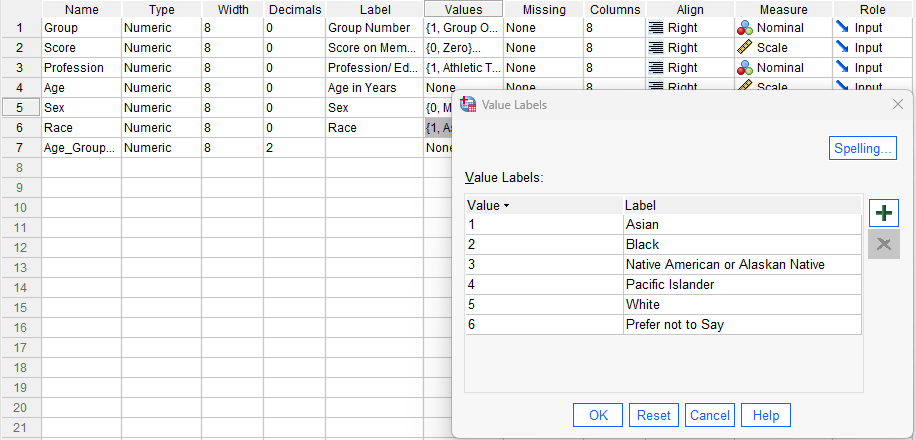


**Appendix I: Scrubbed Data**

**Table I1**

*Scrubbed Data*


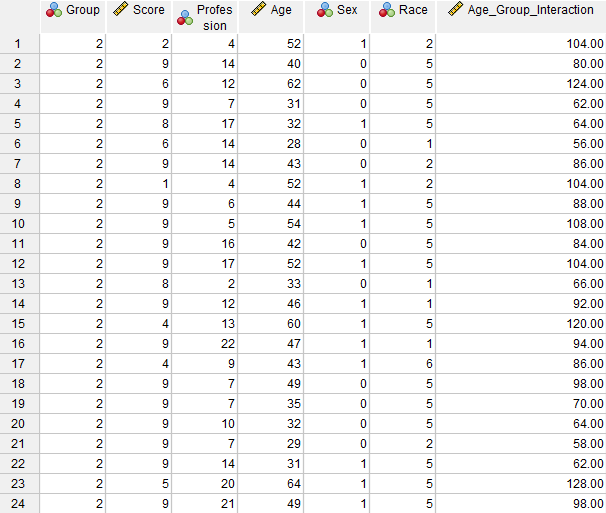


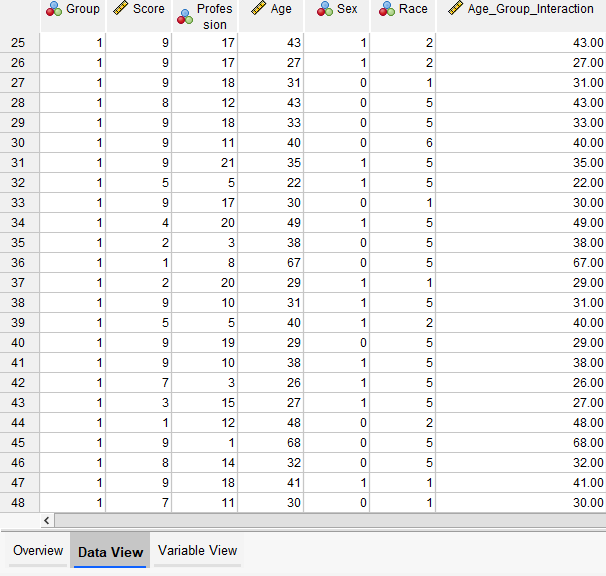


**Appendix J: Professions and Education Majors Represented**

**Table J1**

*Professions and Education Majors Represented*

|  | Profession/Major | Frequency | Percent |
| --- | --- | --- | --- |
|  | Athletic Training | 1 | 2.1 |
|  | Biology | 1 | 2.1 |
|  | Caregiving | 2 | 4.2 |
|  | Clerical/ Billing | 3 | 6.3 |
|  | Clinical Psychology | 1 | 2.1 |
|  | Clinical Research | 4 | 8.3 |
|  | Consultant Services | 1 | 2.1 |
|  | Healthcare (General) | 3 | 6.3 |
|  | Healthcare Analytics | 2 | 4.2 |
|  | Healthcare Information Technology | 4 | 8.3 |
|  | Healthcare Education | 1 | 2.1 |
|  | Healthcare Management | 5 | 10.2 |
|  | Profession/Major | Frequency | Percent |
|  | Medicine  Nurse Practitioner | 1  1 | 2.1  2.1 |
|  | Nursing | 5 | 10.2 |
|  | Pharmacy | 3 | 6.3 |
|  | Physical Therapy | 1 | 2.1 |
|  | Social Work | 3 | 6.3 |
|  | Sonography | 2 | 4.2 |
|  | Speech-Language Pathology | 2 | 4.2 |
|  | Surgical Technology | 1 | 2.1 |
|  | Wellness Coaching | 1 | 2.1 |
| Total | - | 48 | 100.0 |

*Note: Distribution of participant jobs by specialty is shown. “Nurse Practitioners” was used to describe persons with training in advanced practice nursing. Modes were management and nursing. Percentages adjusted due to rounding.*

**Appendix K: Sensitivity Analysis**

**Figure K1**

*Sensitivity Analysis*


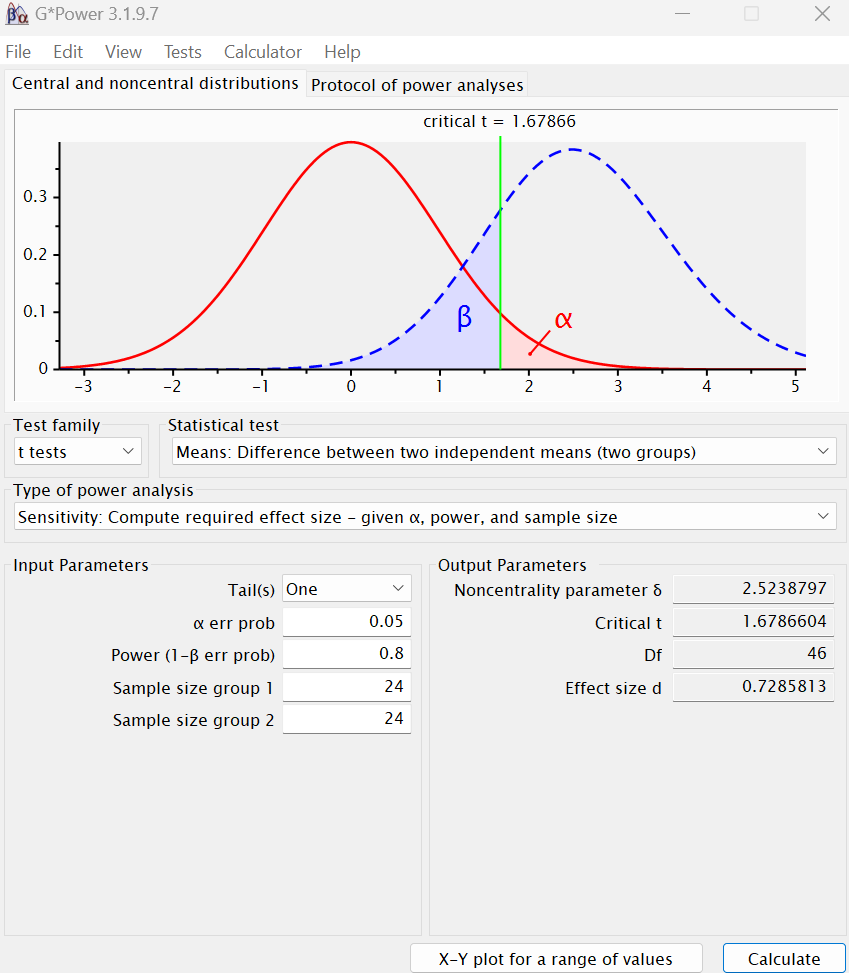


*Note: The analysis shows a required large effect size of .73.*

**Appendix L: Levene’s Test for Equality of Variances**

**Table L1**

*Levene’s Test for Equality of Variances*

|  |  | F | Sig. | t | df |
| --- | --- | --- | --- | --- | --- |
| Score on Memory Tester | Equal σ2 Assumed  Equal σ2 not Assumed | 1.77  - | .19  - | .95  .95 | 46  44.61 |

*Note: Levene’s Test for Equality of Variances.*

**Appendix M: Group Statistics for Independent Samples *t* test**

**Table M1**

*Group Statistics for Independent Samples t test*

|  | Group | N | Mean | Std. Deviation | Std. Error Mean |
| --- | --- | --- | --- | --- | --- |
| Score on Memory Tester | Group One: Control  Group Two: Intervention | 24  24 | 6.7  7.5 | 3  2.5 | .6  .5 |

*Note: Mean, standard deviation, and standard error by group.*

**Appendix N: Effect Size and Confidence Interval**

|  |  | | | 95% CI | |
| --- | --- | --- | --- | --- | --- |
|  |  | Standardizer | Point Estimate | Lower | Upper |
| Score on Memory Tester | Cohen’s d  Hedge’s Correction  Glass’s Delta | 2.74  2.79  2.98 | .27  .27  .25 | .3  .29  .32 | .84  .83  .82 |

*Note: The confidence interval was 95%. The effect size for Cohen's d was small at .27.*

**Appendix O: Segmented Piecewise Regression RStudio Code**

# Install segmented package (only run this once)

install.packages("segmented")

# Load the package

library(segmented)

# Enter your data here

age <- c(52, 40, 62, 31, 32, 28, 43, 52, 44, 54, 42, 52, 33, 46, 60, 47, 43, 49, 35, 32, 29, 31, 64, 49, 43, 27, 31, 43, 33, 40, 35, 22, 30, 49, 38, 67, 29, 31, 40, 29, 38, 26, 27, 48, 68, 32, 41, 30)

score <- c(2, 9, 6, 9, 8, 6, 9, 1, 9, 9, 9, 9, 8, 9, 4, 9, 4, 9, 9, 9, 9, 9, 5, 9, 9, 9, 9, 8, 9, 9, 9, 5, 9, 4, 2, 1, 2, 9, 5, 9, 9, 7, 3, 1, 9,8, 9, 7)

# Create dataframe

df <- data.frame(age, score)

# Fit base linear model

lm_base <- lm(score ~ age, data = df)

# Fit segmented (piecewise) regression

seg_model <- segmented(lm_base, seg.Z = ~age)

# View results

summary(seg_model)

# Plot the segmented model

plot(seg_model)
